# Supplementary material for: Preoperative Frailty Assessed Comprehensively by a Questionnaire Predicts a Poor Survival Following Curative Resection of Gastric Cancer
Source: Research Square preprint supplement (doi:10.21203/rs.3.rs-2636857/v1), 2023-03-16
Supplement: Supplementary file 1 [file 32b052aa9c8ec612b064e73e.xlsx]

## Sheet: Sheet1
Table 3 Summary of patient characteristics and short-term outcomes (n=125).
variables		Frail (n=35)	Non-frail (n=90)	p-Value
Patient characteristics
Age, years	Median (range)	75 (50 - 88)	68.5 (27 - 82)	0.002
Gender, n (%)	Male	24 (68.6)	59 (65.6)	0.835
	Female	11 (31.4)	31 (34.4)
Body mass index, kg/m2	Average ± SD	21.7 ± 3.4	22.3 ± 3.2	0.401
Hb, g/dL	Average ± SD	11.6 ±1.9	13 ± 1.7	<0.001
Serum albumin, g/dL	Average ± SD	3.69 ± 0.48	4.06 ± 0.38	<0.001
CRP, mg/dL	Median (range)	0.1 (0.01 - 2.87)	0.07 (0.01 - 2.17)	0.027
ASA-PS, n (%)	1	0 (0)	14 (15.6)	0.001
	2	25 (71.4)	68 (75.6)
	3	10 (28.6)	8 (8.9)
Frailty index (FI)	Median (range)	0.225 (0.176 - 0.512)	0.095 (0.01 - 0.175)	<0.001
Background and history	Median (range)	0.25 (0.1 - 0.473)	1.25 (0 - 4.5)	<0.001
Quality of life	Median (range)	0.053 (0 - 0.9)	0 (0 - 0.1)	<0.001
Self-consciousness	Median (range)	0.333 (0.056 - 0.833)	0.111 (0 - 0.5)	<0.001
Living function	Median (range)	0.429 (0 - 0.857)	0.143 (0 - 0.571)	<0.001
Nutrition	Median (range)	0.25 (0 - 1 )	0.125 (0 - 0.75)	<0.001
Clinical depth of tumor, n (%)	c T 1a	1 (2.9)	6 (6.7)	0.255
	c T 1b	17 (48.6)	43 (47.8)
	c T 2	7 (20)	11 (12.2)
	c T 3	9 (25.7)	17 (18.9)
	c T 4a	1 (2.9)	13 (14.4)
Clinical lymph node metastasis, n (%)	c N 0	27 (77.1)	67 (74.4)	0.821
	c N (+)	8 (22.9)	23 (25.6)
Clinical stage, n (%)	c Stage I	23 (65.7)	56 (62.2)	0.919
	c Stage II (IIA and IIB)	6 (17.1)	15 (16.7)
	c Stage III	6 (17.1)	19 (21.1)
Short-term outcomes
Type of surgery, n (%)	TG	5 (14.3)	26 (28.9)	0.167
	DG	29 (82.9)	62 (68.9)
	PG	1 (2.9)	2 (2.2)
Surgical approach, n (%)	Laparotomy	16 (45.7)	38 (42.2)	0.841
	Laparoscopy	19 (54.3)	52 (57.8)
Operative times, min	Median (range)	253 (154 - 357)	256 (148 - 426)	0.414
Intraoperative blood loss, ml	Median (range)	100 (5 - 875)	100 (5 - 1250)	0.794
Postoperative complications, n (%)	Grade 3 or more	6 (17.1)	9 (10)	0.357
Discharge, n (%)	Home	30 (85.7)	88 (97.8)	0.018
	Another hospital	5 (14.3)	2 (2.2)
Hospital stay after operation, days	Median (range)	12 (9 - 68)	11 (8 - 57)	0.438
Pathological depth of tumor, n (%)	p T 1 (a / b)	20 (57.1)	43 (47.8)	0.818
	p T 2	3 (8.6)	10 (11.1)
	p T 3	9 (25.7)	24 (26.7)
	p T 4 (a / b)	3 (8.6)	13 (14.4)
Pathological lymph node metastasis, n (%)	p N 0	23 (65.7)	57 (63.3)	0.666
	p N 1	5 (14.3)	10 (11.1)
	p N 2	5 (14.3)	11 (12.2)
	p N 3 (a / b)	2 (5.7)	12 (13.3)
Pathological stage, n (%)	p Stage I (A / B)	22 (62.9)	49 (54.4)	0.583
	p Stage II (A / B)	7 (20)	17 (18.9)
	p Stage III (A / B / C)	6 (17.1)	24 (26.7)
Histology, n (%)	Differentiated	27 (77.1)	51 (56.7)	0.041
	Undifferentiated	8 (22.9)	39 (43.3)
ASA-PS: The American Society of Anesthesiologists physical status
SD: standard deviation
TG: Total gastrectomy, DG: Distal gastrctomy, PG: Proximal gastrectomy
