# Supplementary material for: Preoperative Frailty Assessed Comprehensively by a Questionnaire Predicts a Poor Survival Following Curative Resection of Gastric Cancer
Source: Research Square preprint supplement (doi:10.21203/rs.3.rs-2636857/v1), 2023-03-16
Supplement: Supplementary file 2 [file abbbb144e747dba47450eab6.xlsx]

## Sheet: Sheet1
Table 1 Variables included in the frailty
Background and history	1. Over 80 years old	Yes=1, No=0
	2. Smoking	10 years=1, <10 years=0.5, No=0
	3. High blood pressure	Yes=1, No=0
	4. Stroke	Yes=1, No=0
	5. Hyperlipidaemia	Yes=1, No=0
	6. Cirrhosis	Yes=1, No=0
	7. Chronic Lung Disease	Yes=1, No=0
	8. History of cancer	Yes=1, No=0
	9. Taking anticoagulants / antiplatelet drugs	Yes=1, No=0
	10. Taking immunosuppressive drugs	Yes=1, No=0
	11. Taking 4 or more medicines	Yes=1, No=0
	12. Diabetes	Insulin=1, Hypoglycemic drug=0.5, No=0
	13. Ischemic heart disease	Myocardial infarction=1, CABG=0.75, Catheter treatment=0.5, Taking medicine=0.25, No=0
	14. Dementia	Severe=1, Moderate=0.5, Mild=0.25, No=0
	15. Chronic kidney disease	Dialysis=1, eGFR<40=0.75, eGFR:41-60=0.5, eGFR:61-80=0.25, eGFR>81=0
Quality of life	16. Help Grooming	Yes=1, No=0
	17. Help Dressing	Yes=1, No=0
	18. Help getting in/out of Chair	Yes=1, No=0
	19. Help Bathing	Yes=1, No=0
	20. Help Walking around house	Yes=1, No=0
	21. Help with meal Preparations	Yes=1, No=0
	22. Help with Finances	Yes=1, No=0
	23. Help Driving a car	Yes=1, No=0
	24. Help Shopping	Yes=1, No=0
	25. Help up / down Stairs	Yes=1, No=0
	26. Help with Housework	Yes=1, No=0
	27. Help Using Toilet	Yes=1, No=0
	28. Help with Walking	Wheelchair=1, Walker=0.75, Wand=0.5, No=0
	29. Insomnia	Most of time=1, sometimes=0.5, Rarely=0
	30. Anorexia	Yes=1, No=0
Self-perception	31. Feel useless	Most of time=1, sometimes=0.5, Rarely=0
	32. Feel sad	Most of time=1, sometimes=0.5, Rarely=0
	33. Feel tired	Most of time=1, sometimes=0.5, Rarely=0
	34. Lethargy	Within 1 year =1, Within 1 month, No=0
	35. Feel Depressed	Most of time=1, sometimes=0.5, Rarely=0
	36. Self Rating of Health	Poor=1, Normal=0.5, Good=0
	37. Feel Lonely	Most of time=1, sometimes=0.5, Rarely=0
	38. Anxiety	Most of time=1, sometimes=0.5, Rarely=0
	39. Forgetfulness	Most of time=1, sometimes=0.5, Rarely=0
Living function	40. Turtle back	Yes=1, No=0
	41. How Health has changed in last year	Yes=1, No=0
	42. No regular exercise	Yes=1, No=0
	43. Deafness	Yes=1, No=0
	44. No family and friends	Yes=1, No=0
	45. Living alone	Yes=1, No=0
	46. Grip strength (kg)	See Table 2
Nutrition	47. Weight loss of 5% or more in half a year	Yes=1, No=0
	48. Hb<11	Yes=1, No=0
	49. Body mass index (kg/m2)	<18 or 30< =1, 25-30=0.5, 18-25=0
	50. Serum albumin (g/dL)	<3.5=1, ≥3.5=0
