# Supplementary material for: Preoperative Frailty Assessed Comprehensively by a Questionnaire Predicts a Poor Survival Following Curative Resection of Gastric Cancer
Source: Research Square preprint supplement (doi:10.21203/rs.3.rs-2636857/v1), 2023-03-16
Supplement: Supplementary file 3 [file b83d358a0b402cc064312156.xlsx]

## Sheet: Sheet1
Table 2 Classification of grip strength
	Male	Female
Age	grip strength	grip strength
≤ 64	≥ 30	≥ 18
65 - 69	≥ 27	≥ 18
70 - 74	≥ 26	≥ 15
75 - 79	≥ 24	≥ 14
≥ 80	≥ 22	≥ 13
Applicable=1, Not applicable=0
