# Supplementary material for: Preoperative Frailty Assessed Comprehensively by a Questionnaire Predicts a Poor Survival Following Curative Resection of Gastric Cancer
Source: Research Square preprint supplement (doi:10.21203/rs.3.rs-2636857/v1), 2023-03-16
Supplement: Supplementary file 4 [file eee0a0c95be0040e15fdd401.xlsx]

## Sheet: Sheet1
Table 4 The risk factors for over all survivor about 54 patients after surgery for pStage II / III gastric cancer.
Variables		Univariate analysis		Multivariate analysis
	Comparison	Hazard ratio (95.0%CI)	p-Value	Hazard ratio (95.0%CI)	p-Value
Age	≥ 75 vs. < 75 Years	1.175 (0.445 - 3.103)	0.744
Gender	Male vs. female	1.641 (0.543 - 4.963)	0.38
ASA-PS	3 vs. 1, 2	3.367 (1.196 - 9.481)	0.022	2.261 (0.742 - 6.891)	0.151
Serum albumin	< 3.5 vs. ≥ 3.5 g/dl	1.129 (0.328 - 3.885)	0.847
CRP	≥ 0.5 vs. < 0.5 mg/dL	2.469 (0.327 - 18.65)	0.381
Frail	Present vs. absent	3.027 (1.185 - 7.734)	0.021	3.048 (1.08 - 8.606)	0.035
Surgical procedure	TG vs. DG, PG	1.192 (0.484 - 2.936)	0.703
Surgical approach	Laparotomy vs. laparoscopy	0.829 (0.298 - 2.305)	0.719
Operative time	> 237.5 vs. ≤ 237.5 min (Median)	1.867 (0.729 - 4.779)	0.193
Intraoperative blood loss	> 200 vs. ≤ 200 ml (Median)	1.359 (0.546 - 3.381)	0.51
p Stage	III vs. II	2.642 (0.942 - 7.409)	0.065	3.178 (1.106 - 9.133)	0.032
Histology	undifferentiated vs. differentiated	1.476 (0.599 - 3.639)	0.397
